# Supplementary material for: Risk factors for severe acute lower respiratory infections in children – a systematic review and meta-analysis
Source: PubMed Central journal article supplement (PMC3641871; doi:10.3325/cmj.2013.54.110), 2013-04
Supplement: CroatMedJ_54_s003.pdf [file CroatMedJ_54_s003.pdf]

**Supplementary table 2:** Studies investigating risk factors for severe pneumonia in children under five years of age. (LBW=Low Birth Weight; BF=Breastfeeding; PI=Previous ALRI; CR=Crowding; PS=Passive Smoking; IAP=Indoor Air Pollution; DC=Day Care; MN=Malnutrition; IM=Immunization; ME=Maternal Education; AN=Anemia; VDd=Vitamin D deficiency; GE=Gender; VAd=Vitamin A deficiency; Zd=Zinc deficiency; PB=Preterm Birth; BO=Previous Pregnancy; BI=Birth Interval)

| Location; site characteristics; period of study (reference) | Case ascertainment | Study design | Controls                                                                                                                                                                                                                                                                                                      | Age group   | Sample size | Risk factors                                     | Type of analysis            |
|-------------------------------------------------------------|--------------------|--------------|---------------------------------------------------------------------------------------------------------------------------------------------------------------------------------------------------------------------------------------------------------------------------------------------------------------|-------------|-------------|--------------------------------------------------|-----------------------------|
| Buenos Aires, Argentina; urban; 1984-7 (13)                 | Passive hospital   | Case-control | 154 ambulatory patients attending immunization and well-baby clinics. Gender, age, nutritional status, socioeconomic level, season and place of residence matched                                                                                                                                             | 0-59 months | 1032        | LBW, CR, PS, IAP, IM, PB, BF                     | Univariate                  |
| Basse, Gambia; rural (41)                                   | Active community   | Cohort       |                                                                                                                                                                                                                                                                                                               | 0-59 months | 587         | PS                                               | Multivariate                |
| Naples (Campania), Italy; urban; 1983-88 (26)               | Passive hospital   | Case-control | 73 age matched infants admitted to same ward. Matched for age and month of admission. Controls had the following diagnoses: anemia (5), cardiac disease (7), inguinal hernia and hydrocele (25), congenital clubfoot (12), meningitis (3), otitis (7), febrile seizures (4) and urinary tract infection (10). | 0-5 months  | 146         | BF                                               | Univariate                  |
| Trivandrum (Kerala), India; urban; 1991 (20)                | Passive hospital   | Case-control | 100 out-patients with ARI, with no symptoms of severe pneumonia and not requiring admission for these symptoms at 5 days follow up. No effort made to match controls.                                                                                                                                         | 0-59 months | 400         | CR, PS, IAP, IM, GE, PB                          | Multivariate and Univariate |
| Porto Alegre;Rio Grande do Sul, Brazil; urban; 1990 (9)     | Passive hospital   | Case-control | 500 age-matched children from same neighborhood                                                                                                                                                                                                                                                               | 0-23 months | 1020        | DC, BF, PI, CR, PS, MN, ME, GE, BO, BI, LBW      | Multivariate and Univariate |
| Oslo, Norway; urban; 1992 (42)                              | Passive hospital   | Cohort       |                                                                                                                                                                                                                                                                                                               | 0-11 months | 3238        | PS                                               | Multivariate                |
| Colombo, Sri Lanka; urban (11)                              | Passive hospital   | Case-control | 100 age-matched children on surgical wards                                                                                                                                                                                                                                                                    | 0-59 months |             | LBW, BF, CR, PS, MN, GE, BI                      | Multivariate and Univariate |
| Fortaleza (Ceara State), Brazil; urban; 1989-90 (10)        | Passive hospital   | Case-control | 650 age-matched children from same neighborhood                                                                                                                                                                                                                                                               | 0-23 months | 1300        | DC, BF, PI, CR, IAP, MN, IM, ME, GE, BO, BI, LBW | Multivariate                |
| Addis Ababa, Ethiopia; urban; 1989-93 (36)                  | Passive hospital   | Case-control | 500, age-matched and admitted to hospital within 3 months of case                                                                                                                                                                                                                                             | 0-59 months | 1000        | MN, VDd                                          | Multivariate                |

| Location; site characteristics; period of study (reference)  | Case ascertainment | Study design             | Controls                                                                                                                                                                                | Age group   | Sample size | Risk factors               | Type of analysis            |
|--------------------------------------------------------------|--------------------|--------------------------|-----------------------------------------------------------------------------------------------------------------------------------------------------------------------------------------|-------------|-------------|----------------------------|-----------------------------|
| Pelotas, Brazil; urban; 1993 (22)                            | Passive hospital   | Case-control             | 2391 community based children. Cases and controls were ratified for age but not matched at individual level                                                                             | 0-11 months | 1141        | BF, ME, GE, PB, BO, BI     | Multivariate and Univariate |
| Stockholm (Gothenburg and Malmo), Sweden; urban; 1990-4 (43) | Health records     | Cohort                   |                                                                                                                                                                                         | 0-11 months | 350648      | PS                         | Multivariate                |
| Ballabgarh (Haryana), India; rural; 2003-5 (16)              | Passive hospital   | Case-control             | 311 healthy children below 5 years of age attending immunization clinic                                                                                                                 | 0-59 months | 512         | BF, CR, IAP, MN, IM        | Multivariate and Univariate |
| Basrah, Iraq; urban; 1996-7 (33)                             | Passive hospital   | Case-control             | 250 children attending outpatient department with non-severe ARI that did not require admission for symptoms on follow-up                                                               | 2-59 months | 298         | PS, MN, IM, PB             | Univariate                  |
| Calcutta (West Bengal), India; urban; 1997-8 (17)            | Passive hospital   | Case-control             | 135 children attending hospital for immunization. Stratum matched for age.                                                                                                              | 2-35 months | 262         | CR, IAP, MN, ME, GE        | Multivariate and Univariate |
| Dakshinpuri (New Delhi), India; urban (47)                   | Active community   | Randomized control trial | 1241 children received placebo; comparable for age, anthropometry, child feeding practices, morbidity in previous 24 hours, socioeconomic characteristics and plasma zinc concentration | 6-30 months | 2482        | ZI                         | Univariate                  |
| Gilgit (Gilgit District), Pakistan; urban; 2000 (32)         | Passive hospital   | Case-control             | 187 children with 'coughs and colds', with no signs of pneumonia development at 3 days                                                                                                  | 0-59 months | 446         | PI, CR, PS, MN, IM, ME, GE | Multivariate and Univariate |
| Dhaka, Bagladesh; urban; 1997 (45)                           | Active community   | Randomized control trial | 149 children received placebo                                                                                                                                                           | 1-6 months  | 301         | ZI                         | Multivariate                |
| Matlab Upzila (Chandpur), Bangladesh; rural (46)             | Active community   | Cohort                   |                                                                                                                                                                                         | 5-12 months | 799         | ZI                         | Multivariate                |
| Oxford (Oxfordshire), England; urban; 1995-9 (14)            | Passive hospital   | Case-control             | 872 randomly selected children with same date of birth and sex, with no history of admission for ALRI selected from hospital database                                                   | 0-11 months | 496         | LBW, BF, CR, PS, GE, PB    | Univariate                  |
| Indapur (Maharashtra), India; urban; 2002 (23)               | Passive hospital   | Case-control             | 70 health children younger than 5 living in same area as cases, attending for vaccination. Not matched with cases                                                                       | 0-59 months | 150         | BF, MN, AN, VDd            | Multivariate and Univariate |
| Sao Paulo, Brazil; urban (35)                                | Passive hospital   | Case-control             | 347 children, crudely matched for age, selected from same neighborhood.                                                                                                                 | 2-59 months | 732         | CR                         | Multivariate                |

| Location; site characteristics; period of study (reference)   | Case ascertainment | Study design             | Controls                                                                                                                                                          | Age group   | Sample size | Risk factors                 | Type of analysis            |
|---------------------------------------------------------------|--------------------|--------------------------|-------------------------------------------------------------------------------------------------------------------------------------------------------------------|-------------|-------------|------------------------------|-----------------------------|
| Beersheba (Negev), Israel; rural; 2001-2 (12)                 | Passive hospital   | Case-control             | 529 healthy Bedouin children less than 5 seen for regular check up who had no diagnosis of pneumonia in previous 28 days. Matched for age and month of enrolment. | 0-59 months | 825         | LBW, BF, MN, ME, AN, Vad, BF | Multivariate and Univariate |
| Soweto (Johannesburg), South Africa; 1998-2001 (38)           | Passive hospital   | Randomized control trial | 19,914 children received placebo                                                                                                                                  | 0-72 months | 39,836      | HIV                          | Univariate                  |
| Pelotas, Brazil; urban; 1997-8 (28)                           | Passive hospital   | Case-control             | 152 age matched community based controls with no history of ALRI                                                                                                  | 0-11 months | 777         | BF, PI, CR, ME, GE           | Multivariate and Univariate |
| Mysore (Kamataka), India; urban; 2005 (27)                    | Passive hospital   | Case-control             | 104 healthy children, aged 1-59 months, who were siblings of admitted children for non respiratory complaints during study period                                 | 0-59 months | 208         | BF, CR, MN, IM, ME, AN, VDd  | Multivariate and Univariate |
| Santiago, Chile; urban (24)                                   | Passive hospital   | Cohort                   |                                                                                                                                                                   | 0-11 months | 188         | BF                           | Multivariate and Univariate |
| Manhica (Maputo), Mozambique; rural; 2004-6 (37)              | Passive hospital   | Cohort                   |                                                                                                                                                                   | 0-23 months | 4838        | MN, AN, GE                   | Univariate                  |
| Baffin Island (Nunavut), Canada; rural; 2002-3 (25)           | Passive hospital   | Case-control             | 101 community based, age matched children with no previous history of ALRI. Recruited during study period                                                         | 0-23 months | 220         | BF, CR, PS                   | Multivariate                |
| Nha Trang and Ninh Hoa (Khanh Hoa), Vietnam; mixed; 2006 (40) | Active community   | Cross-sectional study    | 24,145 children with no history of pneumonia in the past 1 year                                                                                                   | 0-59 months | 24781       | PS                           | Multivariate and Univariate |
| Pokhara (Kaski District), Nepal; urban; 2006-7 (44)           | Passive hospital   | Case-control             | 140 age and sex matched children with no LRT symptoms                                                                                                             | 1-60 months | 280         | AN                           | Multivariate                |
| ZVITAMBO Project; Harare; Zimbabwe; 1997-2000 (39)            | Passive hospital   | Cohort                   | 9207 not exposed infants, 2661 exposed but not infected infants                                                                                                   | 0-35 months | 14,110      | HIV                          | Univariate                  |
| San Marcos, Guatemala; rural; 2002-4 (21)                     | Active community   | Randomized control trial | 253 control children                                                                                                                                              | 0-17 months | 534         | IAP                          | Univariate                  |
| Auckland, New Zealand; urban; 2002-4 (15)                     | Passive hospital   | Case-                    | 351 community controls, with similar ages and ethnicity, but not individually                                                                                     | 0-59 months | 428         | DC, LBW, BF, PI, CR, PS,     | Multivariate and            |

| Location; site characteristics; period of study (reference) | Case ascertainment | Study design | Controls                                                                                                                                                     | Age group   | Sample size | Risk factors             | Type of analysis            |
|-------------------------------------------------------------|--------------------|--------------|--------------------------------------------------------------------------------------------------------------------------------------------------------------|-------------|-------------|--------------------------|-----------------------------|
|                                                             |                    | control      | matched                                                                                                                                                      |             |             | MN, IM, GE               | Univariate                  |
| Peshawar (Khyber-Pakhtunkhwa), Pakistan; urban; 2007-8 (19) | Passive Hospital   | Case-control | 200 children of similar age, sex and socioeconomic status hospitalized for causes other than respiratory infections, and also from immunization clinics etc. | 2-60 months | 300         | BF, IAP, IM, ME, GE, VDd | Multivariate                |
| Saskatoon (Saskatchewan), Canada; urban; 2007-8 (34)        | Passive hospital   | Case-control | 92 unmatched controls of same age without respiratory infection                                                                                              | 0-59 months | 197         | CR, PS, IM, VDd          | Multivariate and Univariate |
| Kamalapur (Dhaka), Bangladesh; urban; 2004-5 (18)           | Active community   | Cohort       |                                                                                                                                                              | 0-59 months | 6079        | IAP, ME, GE              | Multivariate and Univariate |
