# Supplementary material for: Risk factors for severe acute lower respiratory infections in children – a systematic review and meta-analysis
Source: PubMed Central journal article supplement (PMC3641871; doi:10.3325/cmj.2013.54.110), 2013-04
Supplement: CroatMedJ_54_s004.pdf [file CroatMedJ_54_s004.pdf]

**Supplementary table S1: Modified GRADE scoring**

| <b>Criteria</b>                |                                | <b>Score</b> |
|--------------------------------|--------------------------------|--------------|
| Design                         | Randomised control trial       | +2 points    |
|                                | Cohort study                   | +1 point     |
|                                | Case control study             | +0.5 points  |
|                                | Cross sectional study          | 0 points     |
| Quality of control group       | Good                           | +1 point     |
|                                | Average                        | -1 point     |
|                                | Poor                           | -2 points    |
| Sample size                    | >500 subjects                  | +0.5 points  |
|                                | 300-500 subjects               | 0 points     |
|                                | <300 subjects                  | -0.5 points  |
| Odds Ratio                     | <0.2                           | +2 points    |
|                                | 0.2-0.49                       | +1 point     |
|                                | 0.5-2                          | 0 points     |
|                                | 2-4.9                          | +1 point     |
|                                | >5                             | +2 points    |
| Confounding factors            | All accounted for              | +1 point     |
|                                | Some accounted for             | 0 points     |
|                                | Not accounted for              | -1 point     |
| Geographical spread of studies | Good geographical distribution | 0 points     |
|                                | Studies in one region only     | -0.5 points  |
