# Supplementary material for: Risk factors for severe acute lower respiratory infections in children – a systematic review and meta-analysis
Source: PubMed Central journal article supplement (PMC3641871; doi:10.3325/cmj.2013.54.110), 2013-04

**Supplementary figure S1:** Meta-analysis of the effect of HIV/AIDS on the occurrence of severe ALRI in children under five years of age.

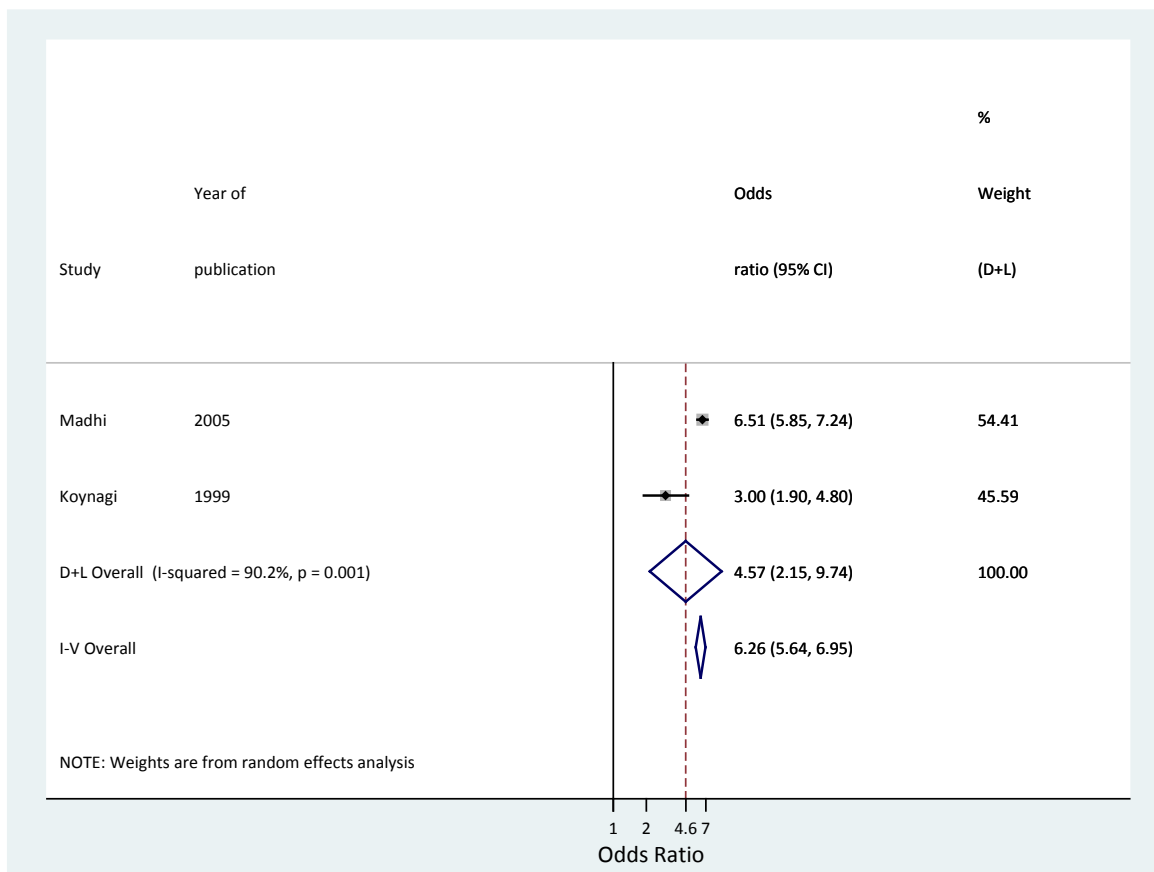

Supplement: CroatMedJ_54_s006.pdf [file CroatMedJ_54_s006.pdf]
